## **Antithrombin glycoforms are selectively physiosorbed on plasma extracellular vesicles**

Annalisa Radeghieri <sup>1,2\*</sup>, Silvia Alacqua <sup>1</sup>, Andrea Zandrini <sup>1,2</sup>, Vanessa Previcini <sup>1</sup>, Francesca Todaro <sup>1</sup>, Giuliana Martini <sup>3</sup>, Doris Ricotta <sup>1,6</sup> and Paolo Bergese <sup>1,2,4,5</sup>

<sup>1</sup> Dept. of Molecular and Translational Medicine, University of Brescia, Italy

<sup>2</sup> Center for Colloid and Surface Science (CSGI), Florence, Italy

<sup>3</sup> Clinical Chemistry Laboratory, Spedali Civili Hospital, Brescia, Italy

<sup>4</sup> Institute for Research and Biomedical Innovation (IRIB), National Research Council, Palermo, Italy

<sup>5</sup> National Inter-university Consortium of Materials Science and Technology (INSTM), Firenze, Italy

<sup>6</sup> GLG Klinikum Barnim GmbH, Werner Forßmann Klinikum Eberswalde, Rudolf-Breitscheid-Straße 100, Eberswalde

### *Correspondence:*

Annalisa Radeghieri, Department of molecular and Translational Medicine, University of Brescia, Viale Europa 11, 25123 Brescia, (Italy)

Tel: 0039-030-3717543

Email: [annalisa.radeghieri@unibs.it](mailto:annalisa.radeghieri@unibs.it)

### **Abstract**

Antithrombin (AT) is a glycoprotein produced by the liver and a principal antagonist of clotting factors. A deficit in AT function leads to AT qualitative deficiency, challenging to diagnose. Here we report that AT may travel physiosorbed on the surface of plasma extracellular vesicles (EVs), contributing to form the “EV-protein corona”. The corona is enriched in specific AT glycoforms, thus suggesting glycosylation to play a key role in AT partitioning between EVs and plasma. This is confirmed by the differences in AT glycoform composition of the corona of EVs separated from plasma of healthy and AT qualitative deficiency-affected subjects. This also supports the hypothesis of the role of altered glycosylation in AT deficiency, with promising translational diagnostic implications.

### **Keywords**

Antithrombin, Extracellular vesicles , Protein corona, glycosylation

### Abbreviations

**EVs**, extracellular vesicles

**AT**, antithrombin

**UC**, ultracentrifugation

**AFM**, Atomic force microscopy

## Introduction

Antithrombin (AT), a heparin cofactor and member of the serine protease inhibitor (serpin) gene family, is an important protease inhibitor that regulates the function of several serine proteases in the coagulation cascade<sup>1</sup>. AT physiologically inactivates thrombin (factor IIa) and factor Xa (FXa) and, to a lesser extent, factors IXa, XIa, XIIa, tissue plasminogen activator (tPA), urokinase, trypsin, plasmin, and kallikrein<sup>2, 3</sup>. The plasma concentration of AT is 112 to 140 mg/L, with a half-life of 2 to 3 days<sup>4, 5</sup>. The liver is the primary source of AT synthesis and post-translational glycosylation<sup>6</sup>. Mature AT has a molecular weight of 58 kDa and four potential N-glycosylation sites at asparagine (Asn) residues, occupied by a biantennary structure of complex N-glycans bearing two terminal sialic acids. The presence of these glycans allows distinguishing two physiological isoforms of AT: the 90% predominant form  $\alpha$ -AT (all the sites occupied), and the 10% subsidiary form  $\beta$ -AT (three sites occupied).  $\beta$ -AT has higher affinity for heparin and is more important in controlling thrombogenic events from tissue injury<sup>7-10</sup>. Clotting inactivation by AT is the consequence of the entrapment of the coagulation factors in an equimolar complex in which the active site of the proteases becomes inaccessible to its usual substrate<sup>11</sup>.

AT circulates in a form that has a low inhibitory activity. Under normal physiological circumstances, the anticoagulant effect of AT is accelerated at least a thousand times in the presence of heparin-like glycosaminoglycans, such as heparan sulphates, located on the vascular endothelium. Besides, the interaction of AT with the endothelium gives rise to an anti-inflammatory effect: it increases the production of the anti-inflammatory cytokine prostacyclin, which then mediates smooth muscle relaxation and vasodilatation and inhibits platelet aggregation<sup>12</sup>.

The evidence for the role AT plays in regulating blood coagulation is demonstrated by the correlation between inherited or acquired AT deficiencies and an increased risk of developing thrombotic disease. Inherited AT deficiency is divided into type I deficiency (T1), in which both the functional activity and levels of AT are proportionately reduced (quantitative deficiency), and type II deficiency (T2), in which normal antigen levels are found in association with low AT activity due to a dysfunctional protein (qualitative deficiency)<sup>13</sup>.

In the last years, together with many other proteins usually considered “soluble” factors<sup>14</sup>, AT has also been found associated with platelet-derived extracellular vesicles (EVs)<sup>15, 16</sup> extracted from plasma or serum, and cell culture media extracted EVs<sup>17, 18</sup>. EVs are nanoparticles released by eukaryotic cells in the form of a lipid membrane that encloses proteins, nucleic acids, and metabolites. They are today considered third way of cell communication - other than direct intercellular physical stimuli and paracrine secretion of active molecules<sup>19</sup> - placing EV research as a key field within immunology, haematology, and cancer cell biology<sup>20, 21</sup>.

The involvement of circulating EVs in coagulation processes has been documented, but their role is still debated, since both coagulation factors and anticoagulant proteins have been found associated to blood EVs<sup>22-26</sup>.

This work presents the first detailed analysis of the association of AT isoforms to circulating plasma EVs and its possible pathophysiological implication and diagnostic translation in T2 deficiency.

## Materials and Methods

### Patients and blood sample collection

Ethical approval was obtained from the Ethical committee of Spedali Civili hospital (Brescia, Nr.NP4761). Patients and control subjects enrolled in the study provided written consent according to the Declaration of Helsinki. Tests were performed on plasma samples obtained from the Haemophilia Centre, Haemostasis and Thrombosis Unit at Spedali Civili (Brescia). Peripheral blood samples were collected from 10 patients diagnosed with T2 AT deficiency, and controls. EDTA was added and samples were immediately centrifuged at 4200 *g* for 10 minutes at 22°C. Samples were anonymized and stored at -80 °C until analysis. At the time of analyses, about 1 mL of plasma was thawed at room temperature (RT) and examined.

### **EV separation protocols**

**Ultracentrifugation (UC) and sucrose gradient.** Plasma EVs were isolated through UC and discontinuous sucrose gradient<sup>28</sup>. Briefly, 1 mL of plasma was processed with three subsequent steps of centrifugation at 4°C: 800 *g*, 16,000 *g* and 100,000 *g*, respectively for 30 minutes, 45 minutes and 2 hours. The supernatant was discarded, and the EV pellet was resuspended in 1 mL of buffer (250 mM sucrose 10 mM Tris-HCl, pH 7.4) and loaded at the top of a discontinuous sucrose gradient. The gradient was centrifuged at 100,000 *g* for 16 hours at 4°C (rotor MLS-50, Beckman Optima MAX). Twelve fractions of 400 µL were collected from the top of the gradient and pelleted by UC at 100,000 *g* for 2 hours at 4°C (Figure 1). Fractions were analyzed with SDS-PAGE and Western Blot (WB).

**Size exclusion chromatography (SEC).** Plasma EVs were also isolated through SEC, using IZON qEVsingle columns. We performed the separation following the producer datasheet on the EVs obtained by the UC steps. A hundred µL of the EV pellet in PBS were loaded on the top of SEC columns. Fractions of 200 µL were collected and fractions 6-11 were centrifuged at 100,000 *g* for 2 hours at 4°C. Pellets were resuspended and analyzed by SDS-PAGE and WB.

### **EV characterization**

**Atomic Force Microscopy (AFM).** EV pellets were resuspended in 50 µL of PBS and diluted 1:10 v/v with deionized water. 5 to 10 µL of samples were then spotted onto freshly cleaved mica sheets (PELCO® Mica discs Grade V-1, thickness 0.15 mm, 10 mm diameter from Ted Pella, Inc). All mica substrates were dried at RT and analyzed using a Nanosurf NanoAFM equipped with Multi75AI-G probes (Budget sensors). Images were acquired in dynamic mode, scan size ranged from 1.5 to 15 µm and scan speed ranged from 0.8 to 1.5 seconds/line. AFM images were processed using Gwyddion ver. 2.58. The size of particles was extrapolated using built-in modules. Particle size distribution was then calculated on GraphPad PRISM ver. 6, by plotting particle size against relative abundance.

**CONAN assay.** EVs were resuspended in 100 µL of Milli-Q water to be checked for purity from protein contaminants and quantified using the Colorimetric NANoplasmonic (CONAN) assay we previously described<sup>29</sup>.

**SDS-PAGE and WB.** EV samples were resuspended in Laemmli buffer and boiled for 5 minutes, before being separated on a 10% polyacrylamide gel. Proteins were then transferred onto a polyvinylidene difluoride (PVDF) membrane (GE Health-care) for immunoblotting and blocked with 5% (w/v) fat-free dried milk in PBS 0.05% Tween-20 (PBST) for 1 hour at 37°C. Membranes were incubated overnight at 4°C with primary antibodies diluted in PBST 1% (w/v) fat-free dried milk. Membranes were washed 3 times in PBST and incubated with the HRP-conjugated secondary antibodies in PBST 1% (w/v) fat-free dried milk for 1 hour at RT. After three washes, chemiluminescence was acquired using Bio-Rad Clarity Western ECL on a G:Box Chemi XT Imaging system (Syngene)<sup>30</sup>. Primary antibodies used: sheep anti-ATIII (Hematologic Technologies INC, PAHAT-S), rabbit anti-Adam10 (Origene, AP05830PU-N), mouse anti-Alix (Santa Cruz, sc-53539), mouse anti-CD63 (Millipore, CBL553), αCD81

(Santa Cruz, sc-7637), mouse anti-Tsg101 (Santa Cruz, sc-7964), rabbit anti-ApoI (ThermoFisher, 701239), and mouse anti-GM130 (BD Bioscience, 610823). Secondary antibodies used: rabbit anti-mouse (Bethyl, A90-117P), donkey anti-sheep (Bethyl, A130-100P), and goat anti-rabbit (Bethyl, A120-101P). Primary antibodies were diluted 1:1000 except for sheep anti-ATIII (1:3000). Secondary antibodies were diluted 1:3000.

**Dot blot assay and trypsin treatment.** Dot blot was performed as previously described<sup>31</sup>. Briefly, EVs were resuspended in 100  $\mu$ L of 100 mM Tris, 150 mM NaCl, 1 mM EDTA. 5  $\mu$ L of EVs diluted 1:1, 1:2, and 1:5 (v/v) in buffer were spotted on a nitrocellulose membrane and allowed to dry at RT for 1 hour. Membranes were then blocked with 5% (w/v) fat-free dried milk in Tris-buffered saline (TBS) in the absence or presence of 0.1% (v/v) Tween-20 for 1 hour at RT, followed by the incubation overnight at 4°C with anti-CD63, anti-Ago2 (Origene, TA352430) and anti-ATIII antibodies, diluted 1:1000 in TBS or TBST 1% fat-free dried milk. After 3 washes with TBS or TBST, membranes were incubated with HRP-conjugated with proper secondary antibodies diluted in TBS or TBST 1% fat-free dried milk for 1 hour at RT. Blots were detected as described above. EV samples were also treated with 0.25% trypsin and incubated for 10 minutes at 37°C. Samples were then centrifuged at 100,000  $g$  for 2 hours. The pellet and supernatant were dotted on the nitrocellulose membrane, as just described. The membranes were incubated with or without 0.1% (v/v) Tween-20.

## 2D Gel Electrophoresis (2D SDS-PAGE)

**TCA-DOC/Acetone purification.** To precipitate proteins and remove contaminants, EV samples were incubated at RT with 2% Na deoxycholate (DOC) (0.02% final concentration) and then with 10% trichloroacetic acid (TCA) for 15 minutes and 1 hour, respectively. Samples were centrifuged at 20,000  $g$  for 10 minutes at 4°C, then 200  $\mu$ L of ice-cold acetone was added, incubating the sample on ice for 15 minutes. The step was repeated, and the resulting pellet was dried by inversion. Samples were finally resuspended with 350  $\mu$ L of Rehydration buffer (Urea 7 M, Thiourea 2 M, CHAPS 4% (w/v), Carrier Ampholyte 0.5% (v/v), DTT 40 mM, Bromophenol Blue 0.002%), for the following 2D-PAGE.

**2D-PAGE.** For the electrofocusing (IEF) phase, immobilized pH gradient (IPG) strips of 18 cm having a pH range 4-7 (Ready Strips, Bio-Rad) were used and were rehydrated overnight at RT, adapting from<sup>9</sup>. IEF was then performed on a Multiphor II Electrophoresis System with ImmobilineDryStrip Kit (Amersham Biosciences, Ge Healthcare), in 4 consecutive steps: 1) 1 minute at 500 V, 1 mA, 5 W; 2) 1 hour at 500 V, 1 mA, 5 W; 3) 4 hours at 3500 V, 1 mA, 5 W; 4) 13.30 hours at 3500 V, 1 mA, 5 W. After IEF, strips were equilibrated at RT under gently mixing with two different solutions of Equilibration buffer (SDS 2% (w/v), Urea 36% (w/v), 50 mM Tris-HCl pH 8.4, Glycerol 30% (v/v)) with DTT 2% (w/v) and iodoacetamide 2.5% (w/v), for 12 and 5 minutes, respectively. Strips were then frozen. Subsequently, strips were cut and the 6 cm piece with a pH range of 5-6 was inserted on the top of 8% SDS-PAGE gel and sealed with hot agarose solution (0.5% agar and Bromophenol Blue in Running buffer 1X). Electrophoresis and subsequent Western blot were performed as described above.

## EV Track

All relevant data has been submitted to the EV-TRACK knowledgebase<sup>32</sup>. EV track ID: EV21008.

## Results

### 1. Antithrombin is associated to plasma small EVs

To separate and purify EVs from plasma, we performed differential (ultra)-centrifugations, followed by purification through a discontinuous sucrose gradient<sup>28</sup>.

Thanks to this purification protocol, we obtained a varied population of EVs, mainly enriched in small EVs. To verify the presence of EVs, Western blotting (WB) was performed on common EV markers as Adam10, Alix, Tsg101, CD63 and CD81<sup>27</sup>. The negative marker GM130, was analyzed to exclude cellular contamination in the samples, and ApoAI, the specific marker for HDL lipoproteins, was checked to verify if AT co-eluted also in fractions containing HDLs.

As shown in Figure 2A, EVs are concentrated in fractions 6 to 9 (with density ranging from 1.11 and 1.22 g/cm<sup>3</sup>). Conversely, GM130 is absent in all fractions, meaning that our samples do not contain any cellular contaminants. AT spreads from fractions 4 to 9.

Recent studies demonstrated that the fraction with a density of 1.09 g/cm<sup>3</sup> may contain protein macro-aggregates or ectosomes, vesicles with a cellular origin that incorporate the coagulation factors released by platelets and endothelial cells<sup>33</sup>.

The sucrose gradient allowed us to separate also HDLs, which are present in fractions 3 to 5 and are particularly abundant in fraction 4 (with a density of 1.07 g/cm<sup>3</sup>, comparable with the density of the most abundant HDL types<sup>34</sup>). Gradient fraction 4 shows the presence of ApoAI and AT: it might suggest that AT circulates in blood not only associated with EVs but also with HDLs. Afterwards, fractions 6-9 were used for the subsequent analysis steps, being the fractions most enriched in EVs and deprived in HDLs.

Particles were then imaged. AFM was employed to verify the presence of EVs in the selected fractions (6-9) and visualize their morphology and size<sup>35, 36</sup>. Round-shaped objects with diameters ranging from 20 to 170 nm (Figure 2B) are visible in all the fractions tested. According to the size distribution analysis (Figure 2C) performed, most of the particles (~95%) are comprised in the 30-180 nm range, which is compatible with the size of small EVs. Objects featuring a size < 30 nm are almost absent (< 5%), further confirming the content of smaller biogenic particles of the fractions (e.g. HDLs, often co-isolated with small EVs) is negligible.

To confirm that AT is present on EVs and that this finding is not an artefact of the separation method used<sup>37</sup>, we have also performed the separation of EVs by size exclusion chromatography (SEC), a more gentle and non-disruptive method.

As seen in Figure S1, AT is present in EV fractions eluted from SEC together with EV markers Adam 10 and CD81.

Taken together these results show that AT can circulate in blood on EVs and not only in a soluble free form<sup>38</sup>.

## **2. AT is localized at the EV surface**

AT is known in literature as a secreted protein circulating in the blood, although our evidence highlights it is also associated with EVs.

To characterize the nature of this binding, a dot blot analysis has been performed. The technique consists of spotting purified EVs onto a nitrocellulose membrane at different dilutions. Afterwards, a WB is performed. Under these experimental conditions, if the vesicular protein is exposed to the solvent, it should be detected in the presence or absence of a detergent (which disrupts the membranes and allows the inner proteins to spread in the solution). As opposite, if the protein is contained inside the vesicles, it should be detected only in the presence of the detergent<sup>39, 40</sup>. Argonaute (Ago), being a protein present within the EVs, has been used as a negative control in this experiment. As shown in Figure 3A, only blots immunolabeled in the presence of the detergent revealed Ago2 signals when compared with

the control (without detergent). On the contrary, the positive controls like CD63 and Tsg101 were detected in both membranes treated or not with detergent. These two EV markers are transmembrane proteins or endosome/membrane-binding proteins.

Results obtained with this experiment indicate that AT is localized in the EV membrane facing outwards since antibody anti-AT recognizes the epitope located outside of the vesicles, hence it cannot be an internal protein of EVs.

To verify whether AT could be detached from the EV membranes, EVs have been treated with trypsin (Figure 3B). Trypsin is a serine protease that hydrolyses proteins cleaving peptide chains mainly at the carboxyl side of the amino acid lysine or arginine. This treatment should detach and cleave the proteins linked or accessible in the vesicle membrane, releasing them in the extra-vesicular medium<sup>41</sup>. Purified EVs from the sucrose gradient fractions were resuspended in a specific buffer with the addition of trypsin. After incubation and separation by ultracentrifugation, the pellet and supernatant were then dotted on the nitrocellulose membrane by applying the protocol described. As shown in Figure 3B, AT is enriched in the supernatant, meaning that trypsin has digested the protein and released it in solution. This observation corroborates the findings described above, suggesting that AT is a surface EV protein.

### **3. Specific AT glycoforms are enriched at the surface of EVs**

As evidenced earlier, AT can be modified by N-glycosylation<sup>10</sup>. Since the partitioning of plasma proteins in blood seems to be influenced by glycosylation<sup>42</sup>, but no reported studies have compared EV glycosylation to the matched plasma, we verified if all the different glycoforms of AT circulating in plasma are also associated with EVs. To compare free soluble and EV-AT glycoforms we performed a 2D SDS-PAGE followed by WB on whole plasma (30  $\mu$ g of proteins loaded on gel) and on isolated EV samples (gradient fractions 6-9), both derived from healthy subjects. Comparing the 2D profiles we could observe different patterns (Figure 4A). Soluble AT exhibits a particular pattern composed of many spots at different intensities, similar to purified soluble AT<sup>9</sup>. EV-AT pattern shows instead a different profile: the overall number of EV adsorbed glycoforms is lower and there seems to be a specificity in binding for certain glycoforms with respect to others. In particular, glycoforms between 5.10 and 5.15 in pI units are almost absent in EVs while more acidic glycoforms (below 5.07 *circa*) or more basic (above 5.22 *circa*) are present. This pattern is not due to the total amount of loaded proteins but to a selective adsorption of those isoforms as evidenced in Figure 4C by the elaboration of densitometric profile of the AT spots of free and EV-AT, reporting relative abundances of AT glycoforms at different pIs intervals.

Hence, we hypothesize AT glycoforms are selectively attached to EV surface based on charge-to-charge interactions between the surface glycans.

### **4. EV associated AT shows a different 2D pattern between healthy and T2 patients**

T2 deficiencies are caused by mutations within the primary sequence of AT, affecting either the reactive site or the heparin-binding domain or finally the mobility of the reactive loop after heparin-binding<sup>13</sup>. Given that AT glycoforms selectively associate with EVs in healthy subjects, we verified if AT mutations in T2 deficiencies could lead to different AT adsorption patterns to EVs, possibly helping to discriminate between healthy and pathological samples and to explain the molecular mechanism of AT deficiencies. We follow the hypothesis that mutations in the primary sequence of AT might lead to conformational changes in the

structure of the enzyme, probably influencing its glycosylation pattern and adsorption to the EV surface<sup>43-45</sup>.

We performed 2D SDS-PAGE of EV protein extracts derived from 8 T2 affected patients (each experiment was performed in triplicate). As shown in figure 4B, which reports representative WBs of three different patients EV samples, T2 samples present a higher number of AT glycoforms bearing a more basic pI, in respect to control (healthy EVs). In particular the pI interval between 5.10 and 5.15 shows 3 to 4 glycoforms that are not present in EVs from controls. The differences are also well evidenced in the elaboration of the densitometric profile shown in figure 4C.

## Discussion

In the past few years, it has become clearer and clearer that EV surface molecules are of critical functional significance<sup>14</sup> since they allow to establish connections with cells<sup>46</sup> and with other biogenic nanoparticles in biological fluids<sup>47</sup>. EV surface molecules comprise integral, peripheral, and lipid-anchored membrane proteins, but also an extravesicular cargo of proteins adsorbed to EVs, at least partly recruited in body fluids after vesicle shedding.

We might assume that only few of the proteins on EV surface are recruited during vesicle biogenesis and/or release by the producing cell but most of them are probably recruited when EVs circulate in a biological fluid, such as blood. As demonstrated for synthetic nanoparticles<sup>48</sup>, EVs are able to recruit on their surface numerous proteins which are present at high concentrations in circulation. The nature of such “protein corona” has recently started to be investigated as for other biogenic nanoparticles<sup>14, 39, 49, 50</sup>. Such investigation promises to disclose new properties of EVs since EV protein corona might be involved in EV-mediated cellular communication or can even provide EVs with new regulatory functions.

In this pilot study we provide strong evidence that AT is part of the protein corona of EVs with a composition modulated by glycosylation. First, we have evidenced AT is effectively present on EVs, by applying different separation techniques, which allowed us to confirm the presence of the protein on-board. Since by bioinformatic predictions and literature data AT is not predicted to be a membrane-anchored protein and it is normally shed into the circulation by hepatocytes by transport along the exocytotic pathway<sup>51</sup>, we verified its association to EVs by dot blot analysis. This technique confirmed that AT shows an exofacial topology and it is indeed detachable by treatment with trypsin<sup>41</sup>.

As mentioned earlier, AT is a glycoprotein, and its glycosylation is vital for its secretion by hepatic cells and its function as anticoagulant agent<sup>43, 52</sup>. Glycosylation has also been reported to have a role in recruiting proteins to HDLs<sup>42</sup>, hence we verified if this post translational modification could also play a role in the association process of AT to EVs.

By performing 2D-SDS PAGE, which allows discriminating the different glycoforms of AT, we have evidenced for the first time that not all the free soluble glycoforms are equally adsorbed to EV surface, and some are more favoured for EV recruitment, indicating glycan specificity in recruiting AT onto EVs. This is the first observation that a protein is specifically attached to the EV surface based on its glycosylation, although others have shown that glycosylation is important for EV biodistribution<sup>53</sup> and functions<sup>54</sup>.

We believe that studying the selectivity of attachment of AT glycoforms to EVs could be of importance to unravel hidden roles of AT in the coagulation process<sup>55</sup>. EVs could indeed offer a surface to accelerate the anticoagulant effect of AT in circulation, as it happens for vascular endothelium heparan sulfates<sup>12</sup>, or bring a local anti-inflammatory effect.

Notably, AT can be defined as a very “sticky” protein since it has also been found attached to the surface of HDLs<sup>56, 57</sup>, conferring these lipoproteins a direct role in coagulation that has not

been yet investigated, and as protein corona component of PEG-liposomes after incubation with fetal bovine serum under dynamic and static conditions<sup>58</sup>. Since AT glycosylation has not been considered in these cited literature results, we might assume that a signature of specific AT glycoforms can be found on the protein corona of HDLs and synthetic liposomes, bringing along diagnostic and therapeutic implications.

We further verified our observations by analysing EV-AT glycoforms in T2 patients. It has been earlier hypothesized that altered glycosylation might be involved in AT deficiencies<sup>43-45</sup>. Our results show a specific EV-AT adsorption pattern in respect to controls' patterns with a prevalence of more acidic glycoforms adsorbed to EVs in T2 patients (Fig. 4). This supports previous evidences that glycosylation plays a key role in AT deficiencies, in turn suggesting that differential glycosylation analysis of EV-AT could help to explain the significantly increased risk for thromboembolism, predominantly in the venous circulation, that affects T2 patients. It has been evidenced previously that EV glycosylation can help to discriminate between healthy and pathological samples, and specific EV glycoconjugates are potential cancer biomarkers<sup>59</sup>. In a similar fashion, also HDL glycoprotein composition, including specificity in glycosylation, can help to differentiate pathologies and correlate with HDL functions<sup>60</sup>.

Our results demonstrate that the study of AT glycoforms adsorbed to isolated EVs may be useful for setting up new diagnostic tests to identify AT deficiency subtypes, that could improve AT deficiencies diagnosis and management. Indeed, current methods to measure levels of functional AT make use of synthetic substrate technology<sup>61</sup>. Those methods bear many limitations ascribable to the type of synthetic peptide employed and to substrate cleavage by contaminant proteases. This diagnostic limitation also hampers the prognosis since different subtypes may have a lower risk of thrombosis.

As a general observation, we can conclude that the study of binding specificity of proteins on EV corona is a challenging but promising approach that could help to discover novel physiological roles of proteins and their involvement in different pathologies.

Our work wants to open up a new perspective in the EV field, although we are aware that this is a pilot study with a small sample size in T2 deficient patient groups, hence it will require further studies to corroborate our findings. In addition to larger sample size, future studies will need to examine the correlation of different AT mutations with EV adsorption capacity. Furthermore, it will be interesting to compare other pathologies that relate glycan biosynthesis and AT deficiencies (e.g. congenital disorders of glycosylation). In this study we analyzed AT glycoforms by 2D-SDS-PAGE, an acknowledged technique to explore post-translational modifications. Future studies should examine the glycoprofile of AT glycoforms attached to EVs by mass spectrometry, in order to distinguish differently glycosylated isoforms.

## **Acknowledgments**

This research was supported the University of Brescia through "Fondo per la ricerca ex 60%", by MIUR through PRIN 2017E3A2NR\_004 project to A.R and P.B. and by the National Interuniversity Consortium of Materials Science and Technology (INSTM) through internal funds.

## **Authorship Contributions**

Conceptualization: Annalisa Radeghieri, Doris Ricotta. Investigation: Annalisa Radeghieri, Silvia Alacqua, Francesca Todaro, Vanessa Previcini. Resources: Giuliana Martini. Writing – Original Draft: Annalisa Radeghieri, Silvia Alacqua, Andrea Zendrini. Writing- Review &



Editing: All authors. Visualization: Andrea Zendrini. Supervision: Annalisa Radeghieri, Paolo Bergese. Project administration: Annalisa Radeghieri. Funding acquisition: Annalisa Radeghieri, Paolo Bergese.

### Disclosure of conflicts of interest

No potential conflict of interest was reported by the authors.

### References

1. SC B. Antithrombin III and heparin cofactor II. *Hemostasis and Thrombosis: Basic Principles and Clinical Practice*. LippincottWilliams & Wilkins; 2001.
2. Persson E, Bak H, Olsen OH. Substitution of valine for leucine 305 in factor VIIa increases the intrinsic enzymatic activity. *The Journal of biological chemistry*. Aug 3 2001;276(31):29195-9. doi:10.1074/jbc.M102187200
3. Danielsson A, Björk I. Mechanism of inactivation of trypsin by antithrombin. *The Biochemical journal*. 1982;207(1):21-28. doi:10.1042/bj2070021
4. Murano G, Williams L, Millerandersson M, Aronson DL, King C. Some Properties of Anti-Thrombin-III and Its Concentration in Human-Plasma. *Thrombosis Research*. 1980;18(1-2):259-262. doi:10.1016/0049-3848(80)90190-5
5. Mammen EF. Antithrombin: its physiological importance and role in DIC. *Semin Thromb Hemost*. 1998;24(1):19-25. doi:10.1055/s-2007-995819
6. Petersen TE D-WG, Sottrup-Jensen L, et al. Primary structure of antithrombin III (heparin cofactor): partial homology between alpha 1 antitrypsin and antithrombin III. In: Collen D WB, Verstraete M, eds, ed. *The Physiological Inhibitors of Blood Coagulation and Fibrinolysis*. Elsevier Science; 1979:43-54.
7. Franzen LE, Svensson S, Larm O. Structural studies on the carbohydrate portion of human antithrombin III. *The Journal of biological chemistry*. Jun 10 1980;255(11):5090-3.
8. Donges R, Romisch J, Stauss H, Brazel D. Separation of antithrombin III variants by micellar electrokinetic chromatography. *J Chromatogr A*. Jul 27 2001;924(1-2):307-13. doi:10.1016/s0021-9673(01)00827-5
9. Kremser L, Bruckner A, Heger A, et al. Characterization of antithrombin III from human plasma by two-dimensional gel electrophoresis and capillary electrophoretic methods. *Electrophoresis*. Dec 2003;24(24):4282-90. doi:10.1002/elps.200305651
10. Picard V, Ersdal-Badju E, Bock SC. Partial glycosylation of antithrombin III asparagine-135 is caused by the serine in the third position of its N-glycosylation consensus sequence and is responsible for production of the beta-antithrombin III isoform with enhanced heparin affinity. *Biochemistry*. Jul 4 1995;34(26):8433-40. doi:10.1021/bi00026a026
11. Olson ST, Bjork I. Regulation of thrombin activity by antithrombin and heparin. *Semin Thromb Hemost*. 1994;20(4):373-409. doi:10.1055/s-2007-1001928
12. Patnaik MM, Moll S. Inherited antithrombin deficiency: a review. *Haemophilia*. Nov 2008;14(6):1229-39. doi:10.1111/j.1365-2516.2008.01830.x
13. Lane DA, Bayston T, Olds RJ, et al. Antithrombin mutation database: 2nd (1997) update. For the Plasma Coagulation Inhibitors Subcommittee of the Scientific and

Standardization Committee of the International Society on Thrombosis and Haemostasis. *Thromb Haemost.* Jan 1997;77(1):197-211.

14. Buzas EI, Toth EA, Sodar BW, Szabo-Taylor KE. Molecular interactions at the surface of extracellular vesicles. *Semin Immunopathol.* Apr 16 2018;doi:10.1007/s00281-018-0682-0
15. Siljander P, Carpen O, Lassila R. Platelet-derived microparticles associate with fibrin during thrombosis. *Blood.* Jun 1 1996;87(11):4651-63.
16. Levin GY, Sukhareva E. Antithrombin activity in microvesicles derived from stored red blood cells. *Blood Transfus.* Oct 2015;13(4):688-9. doi:10.2450/2015.0016-15
17. Atay S, Gercel-Taylor C, Kesimer M, Taylor DD. Morphologic and proteomic characterization of exosomes released by cultured extravillous trophoblast cells. *Experimental cell research.* May 1 2011;317(8):1192-202. doi:10.1016/j.yexcr.2011.01.014
18. Luengo-Gil G, Garcia-Andreo AB, Ortega-Sabater C, et al. Antithrombin is incorporated into exosomes produced by antithrombin non-expressing cells. *Biochimie.* Oct 2019;165:245-249. doi:10.1016/j.biochi.2019.08.010
19. Mathieu M, Martin-Jaular L, Lavieu G, Thery C. Specificities of secretion and uptake of exosomes and other extracellular vesicles for cell-to-cell communication. *Nature cell biology.* Jan 2019;21(1):9-17. doi:10.1038/s41556-018-0250-9
20. Morad-Rémy Muhsin-Sharafaldine<sup>1</sup> SCS, Amy C. Dunn<sup>1</sup>, James, M. Faed<sup>2</sup> TK, Alexander D. McLellan<sup>1,4</sup>. Procoagulant and immunogenic properties of melanoma exosomes, microvesicles and apoptotic vesicles. *Oncotarget.* 2016;7(35)
21. Berardocco M, Radeghieri A, Busatto S, et al. RNA-seq reveals distinctive RNA profiles of small extracellular vesicles from different human liver cancer cell lines. *Oncotarget.* Oct 10 2017;8(47):82920-82939. doi:10.18632/oncotarget.20503
22. Nomura S. Extracellular vesicles and blood diseases. *Int J Hematol.* Apr 2017;105(4):392-405. doi:10.1007/s12185-017-2180-x
23. Nomura S, Ozaki Y, Ikeda Y. Function and role of microparticles in various clinical settings. *Thromb Res.* 2008;123(1):8-23. doi:10.1016/j.thromres.2008.06.006
24. Tripisciano C, Weiss R, Eichhorn T, et al. Different Potential of Extracellular Vesicles to Support Thrombin Generation: Contributions of Phosphatidylserine, Tissue Factor, and Cellular Origin. *Sci Rep.* Jul 26 2017;7(1):6522. doi:10.1038/s41598-017-03262-2
25. Dahlback B, Wiedmer T, Sims PJ. Binding of anticoagulant vitamin K-dependent protein S to platelet-derived microparticles. *Biochemistry.* Dec 29 1992;31(51):12769-77. doi:10.1021/bi00166a009
26. Perez-Casal M, Downey C, Fukudome K, Marx G, Toh CH. Activated protein C induces the release of microparticle-associated endothelial protein C receptor. *Blood.* Feb 15 2005;105(4):1515-22. doi:10.1182/blood-2004-05-1896
27. Thery C, Witwer KW, Aikawa E, et al. Minimal information for studies of extracellular vesicles 2018 (MISEV2018): a position statement of the International Society for Extracellular Vesicles and update of the MISEV2014 guidelines. *J Extracell Vesicles.* 2018;7(1):1535750. doi:10.1080/20013078.2018.1535750
28. Grossi I, Radeghieri A, Paolini L, et al. MicroRNA34a5p expression in the plasma and in its extracellular vesicle fractions in subjects with Parkinson's disease: An exploratory study. *Int J Mol Med.* Dec 2 2020;doi:10.3892/ijmm.2020.4806
29. Zendrini A, Paolini L, Busatto S, et al. Augmented Colorimetric NANoplasmonic (CONAN) Method for Grading Purity and Determine Concentration of EV Microliter Volume Solutions. *Front Bioeng Biotechnol.* 2019;7:452. doi:10.3389/fbioe.2019.00452
30. Alvisi G, Paolini L, Contarini A, et al. Intersectin goes nuclear: secret life of an endocytic protein. *The Biochemical journal.* Mar 29 2018;doi:10.1042/BCJ20170897

31. Lai CP, Kim EY, Badr CE, et al. Visualization and tracking of tumour extracellular vesicle delivery and RNA translation using multiplexed reporters. Article. *Nature Communications*. 05/13/online 2015;6:7029. doi:10.1038/ncomms8029  
[http://www.nature.com/articles/ncomms8029 - supplementary-information](http://www.nature.com/articles/ncomms8029-supplementary-information)
32. Consortium E-T, Van Deun J, Mestdagh P, et al. EV-TRACK: transparent reporting and centralizing knowledge in extracellular vesicle research. *Nat Methods*. Feb 28 2017;14(3):228-232. doi:10.1038/nmeth.4185
33. Sadallah S, Eken C, Schifferli JA. Ectosomes as modulators of inflammation and immunity. *Clin Exp Immunol*. Jan 2011;163(1):26-32. doi:10.1111/j.1365-2249.2010.04271.x
34. Karimi N, Cvjetkovic A, Jang SC, et al. Detailed analysis of the plasma extracellular vesicle proteome after separation from lipoproteins. *Cell Mol Life Sci*. Feb 13 2018;doi:10.1007/s00018-018-2773-4
35. Paolini L, Zendrini, A. and Radeghieri A. . Biophysical properties of extracellular vesicles in diagnostics. *Biomarkers in Medicine*. 2018;doi:10.2217/bmm-2017-0458
36. Berardocco M, Radeghieri A, Busatto S, et al. RNA-seq reveals distinctive RNA profiles of small extracellular vesicles from different human liver cancer cell lines. *Oncotarget*. 2017;8:82920-82939. doi:10.18632/oncotarget.20503
37. Busatto S, Vilanilam G, Ticer T, et al. Tangential Flow Filtration for Highly Efficient Concentration of Extracellular Vesicles from Large Volumes of Fluid. *Cells*. Dec 16 2018;7(12)doi:10.3390/cells7120273
38. Kumar A, Ragg H. Ancestry and evolution of a secretory pathway serpin. *BMC Evol Biol*. Sep 15 2008;8:250. doi:10.1186/1471-2148-8-250
39. Paolini L, Orizio F, Busatto S, et al. Exosomes Secreted by HeLa Cells Shuttle on Their Surface the Plasma Membrane-Associated Sialidase NEU3. *Biochemistry*. 2018 Dec 5 2017;56(48)doi:10.1021/acs.biochem.7b00665
40. McKenzie AJ, Hoshino D, Hong NH, et al. KRAS-MEK Signaling Controls Ago2 Sorting into Exosomes. *Cell Rep*. May 3 2016;15(5):978-87. doi:10.1016/j.celrep.2016.03.085
41. Choi D, Go G, Kim DK, et al. Quantitative proteomic analysis of trypsin-treated extracellular vesicles to identify the real-vesicular proteins. *J Extracell Vesicles*. 2020;9(1):1757209. doi:10.1080/20013078.2020.1757209
42. Kailemia MJ, Wei W, Nguyen K, et al. Targeted Measurements of O- and N-Glycopeptides Show That Proteins in High Density Lipoprotein Particles Are Enriched with Specific Glycosylation Compared to Plasma. *J Proteome Res*. Feb 2 2018;17(2):834-845. doi:10.1021/acs.jproteome.7b00604
43. de la Morena-Barrio ME, Martínez-Martínez I, de Cos C, et al. Hypoglycosylation is a common finding in antithrombin deficiency in the absence of a SERPINC1 gene defect. *Journal of Thrombosis and Haemostasis*. 2016;14(8):1549-1560. doi:<https://doi.org/10.1111/jth.13372>
44. Martínez-Martínez I, Ordonez A, Navarro-Fernandez J, et al. Antithrombin Murcia (K241E) causing antithrombin deficiency: a possible role for altered glycosylation. *Haematologica*. Aug 2010;95(8):1358-65. doi:10.3324/haematol.2009.015487
45. McCoy AJ, Pei XY, Skinner R, Abrahams JP, Carrell RW. Structure of beta-antithrombin and the effect of glycosylation on antithrombin's heparin affinity and activity. *J Mol Biol*. Feb 21 2003;326(3):823-33. doi:10.1016/s0022-2836(02)01382-7
46. Di Noto G, Chiarini M, Paolini L, et al. Immunoglobulin Free Light Chains and GAGs Mediate Multiple Myeloma Extracellular Vesicles Uptake and Secondary NfκB Nuclear Translocation. *Front Immunol*. 2014;5:517. doi:10.3389/fimmu.2014.00517

47. Busatto S, Yang Y, Walker SA, et al. Brain metastases-derived extracellular vesicles induce binding and aggregation of low-density lipoprotein. *J Nanobiotechnology*. Nov 7 2020;18(1):162. doi:10.1186/s12951-020-00722-2
48. Busatto S, Zendrini A, Radeghieri A, et al. The nanostructured secretome. *Biomater Sci*. Dec 17 2019;8(1):39-63. doi:10.1039/c9bm01007f
49. Asztalos BF, Tani M, Schaefer EJ. Metabolic and functional relevance of HDL subspecies. *Curr Opin Lipidol*. Jun 2011;22(3):176-85. doi:10.1097/MOL.0b013e3283468061
50. Toth EA, Turiak L, Visnovitz T, et al. Formation of a protein corona on the surface of extracellular vesicles in blood plasma. *J Extracell Vesicles*. Sep 2021;10(11):e12140. doi:10.1002/jev2.12140
51. Vogel LK, Larsen JE. Apical and non-polarized secretion of serpins from MDCK cells. *FEBS letters*. May 19 2000;473(3):297-302. doi:10.1016/s0014-5793(00)01548-9
52. Yamada T, Kanda Y, Takayama M, et al. Comparison of biological activities of human antithrombins with high-mannose or complex-type nonfucosylated N-linked oligosaccharides. *Glycobiology*. May 2016;26(5):482-92. doi:10.1093/glycob/cww001
53. Royo F, Cossío U, Ruiz de Angulo A, Llop J, Falcon-Perez JM. Modification of the glycosylation of extracellular vesicles alters their biodistribution in mice. 10.1039/C8NR03900C. *Nanoscale*. 2019;11(4):1531-1537. doi:10.1039/C8NR03900C
54. Williams C, Royo F, Aizpurua-Olaizola O, et al. Glycosylation of extracellular vesicles: current knowledge, tools and clinical perspectives. *J Extracell Vesicles*. 2018;7(1):1442985. doi:10.1080/20013078.2018.1442985
55. Águila S, Noto R, Luengo-Gil G, et al. N-Glycosylation as a Tool to Study Antithrombin Secretion, Conformation, and Function. *International journal of molecular sciences*. 2021;22(2):516.
56. Vaisar T, Pennathur S, Green PS, et al. Shotgun proteomics implicates protease inhibition and complement activation in the antiinflammatory properties of HDL. *The Journal of clinical investigation*. Mar 2007;117(3):746-56. doi:10.1172/JCI26206
57. Gordon SM, Deng J, Lu LJ, Davidson WS. Proteomic characterization of human plasma high density lipoprotein fractionated by gel filtration chromatography. *J Proteome Res*. Oct 1 2010;9(10):5239-49. doi:10.1021/pr100520x
58. Palchetti S, Colapicchioni V, Digiacomio L, et al. The protein corona of circulating PEGylated liposomes. *Biochimica et biophysica acta*. Feb 2016;1858(2):189-96. doi:10.1016/j.bbame.2015.11.012
59. Martins AM, Ramos CC, Freitas D, Reis CA. Glycosylation of Cancer Extracellular Vesicles: Capture Strategies, Functional Roles and Potential Clinical Applications. *Cells*. Jan 8 2021;10(1)doi:10.3390/cells10010109
60. Krishnan S, Shimoda M, Sacchi R, et al. HDL Glycoprotein Composition and Site-Specific Glycosylation Differentiates Between Clinical Groups and Affects IL-6 Secretion in Lipopolysaccharide-Stimulated Monocytes. *Sci Rep*. Mar 13 2017;7:43728. doi:10.1038/srep43728
61. Goodnight SH, Jr., Schaeffer JL, Sheth K. Measurement of antithrombin III in normal and pathologic states using chromogenic substrate S-2238. Comparison with immunoelectrophoretic and factor Xa inhibition assays. *Am J Clin Pathol*. May 1980;73(5):639-47. doi:10.1093/ajcp/73.5.639

## Figure Legends

**Figure 1.** EV purification protocol. Key concept sketched. EVs were isolated from 1 mL of human plasma by differential centrifugation. The pellet was resuspended in Tris-HCl sucrose

8% and loaded on the top of a discontinuous sucrose gradient. Afterwards, twelve fractions were collected, pelleted by ultra-centrifugation and further analyzed.

**Figure 2.** Comprehensive characterization of plasma derived EVs. A) Western blot analysis of sucrose gradient fractions. The distribution of EV (Alix, Adam10, CD63, TSG101, CD81), Golgi (GM130, negative control) and lipoprotein (ApoA1, contaminant) markers is shown, together with AT. Fractions from 6 to 9 feature both the absence of contaminants and the co-localization of AT and EV markers. B) Representative AFM image of the particles in fractions 6-9, displaying intact and round shape, and a size comparable to the one of EV dried on a surface. C) Size distribution of the particles in fractions 6-9, imaged through AFM. Particle diameter was extrapolated from 200 objects.

**Figure 3.** Analysis of AT localization onto EVs. EVs from plasma samples of healthy donors were spotted on nitrocellulose membrane and analyzed with dot-blot. All the tests were performed in presence (+D) and absence (-D) of 0.1% (v/v) Tween-20. A) Immunoblot vs. CD63, TSG101 (EV membrane-associated proteins), Ago2 (lumen protein), and AT in presence and absence of 0.1% (v/v) Tween-20. Membrane (CD63, TSG101) protein signal is not affected by the detergent, while EV lumen proteins (AGO2) are revealed only when the EV membrane is disrupted. The behavior of AT suggests the association with EV membrane rather than its encapsulation within EV lumen.

B) Immunoblot vs. AT performed on plasma EVs and supernatant after trypsin treatment and in presence (+D) or absence (-D) of 0.1% (v/v) Tween-20. Supernatant enriches in AT after trypsin treatment, meaning AT is directly accessible to the protease action, and further suggesting its localization on the outer leaflet of EV membrane.

**Figure 4.** 2D SDS-PAGE on total plasma and isolated EV samples. A) Comparison of the 2D profile of soluble AT in total plasma (above) and EV-associated AT (below), both derived from samples of healthy subjects. pI is indicated. The number of spots is considerably different from plasma to EV, suggesting a degree of “EV-specificity” of some AT glycoforms. B) 2D SDS-PAGE of EV-associated AT derived from T2 patients, showing a different migration pattern in respect to the control sample. C) Densitometric analysis of the spots of soluble and EV-associated AT of healthy subjects and T2 patients. Differences in the relative abundance of AT glycoforms have been highlighted both in soluble and EV-associated AT of healthy subjects and in EV-associated AT of healthy subjects and T2 patients.

**Figure S1.** Biochemical characterization of plasma EVs from SEC. The Western blot analysis of EV isolated with SEC confirmed the co-localization of EV markers and AT.

## Figures

### Figure 1

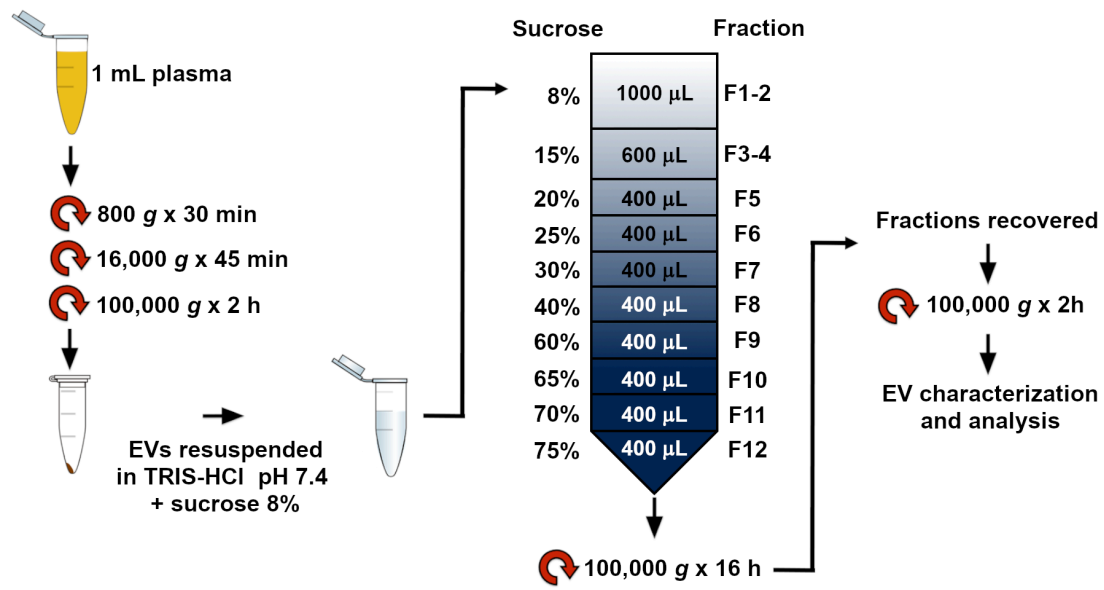

**Figure 2**

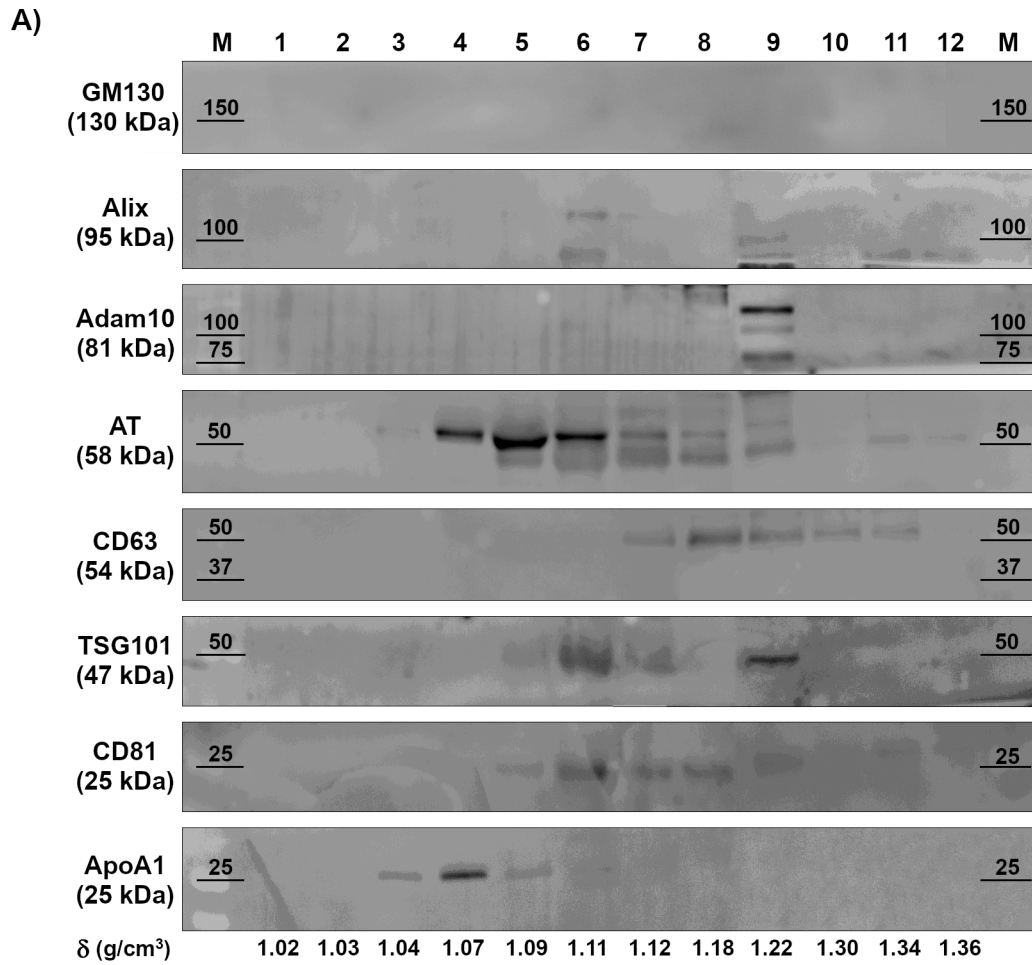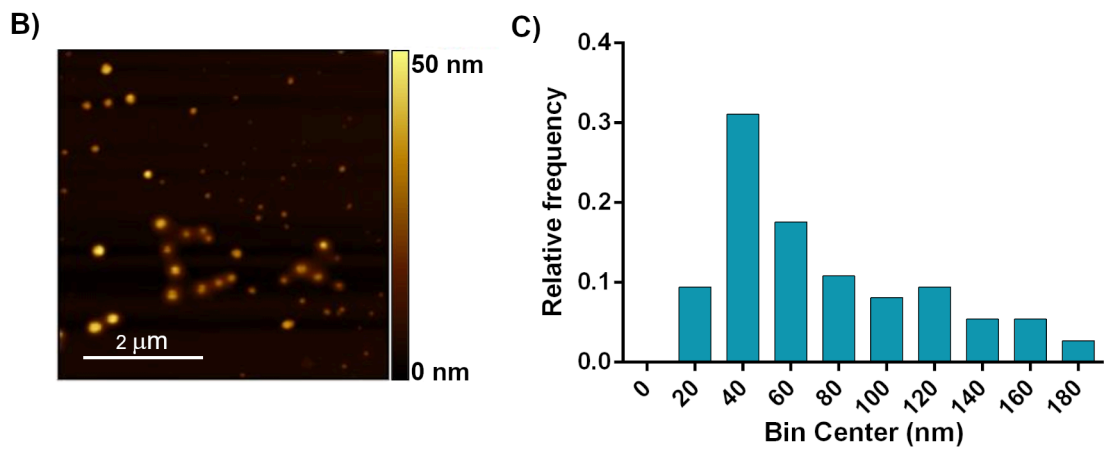

**Figure 3**

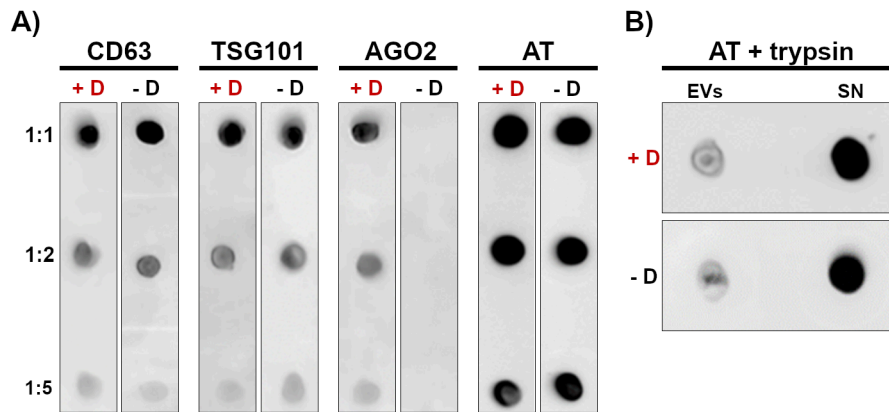

**Figure 4**

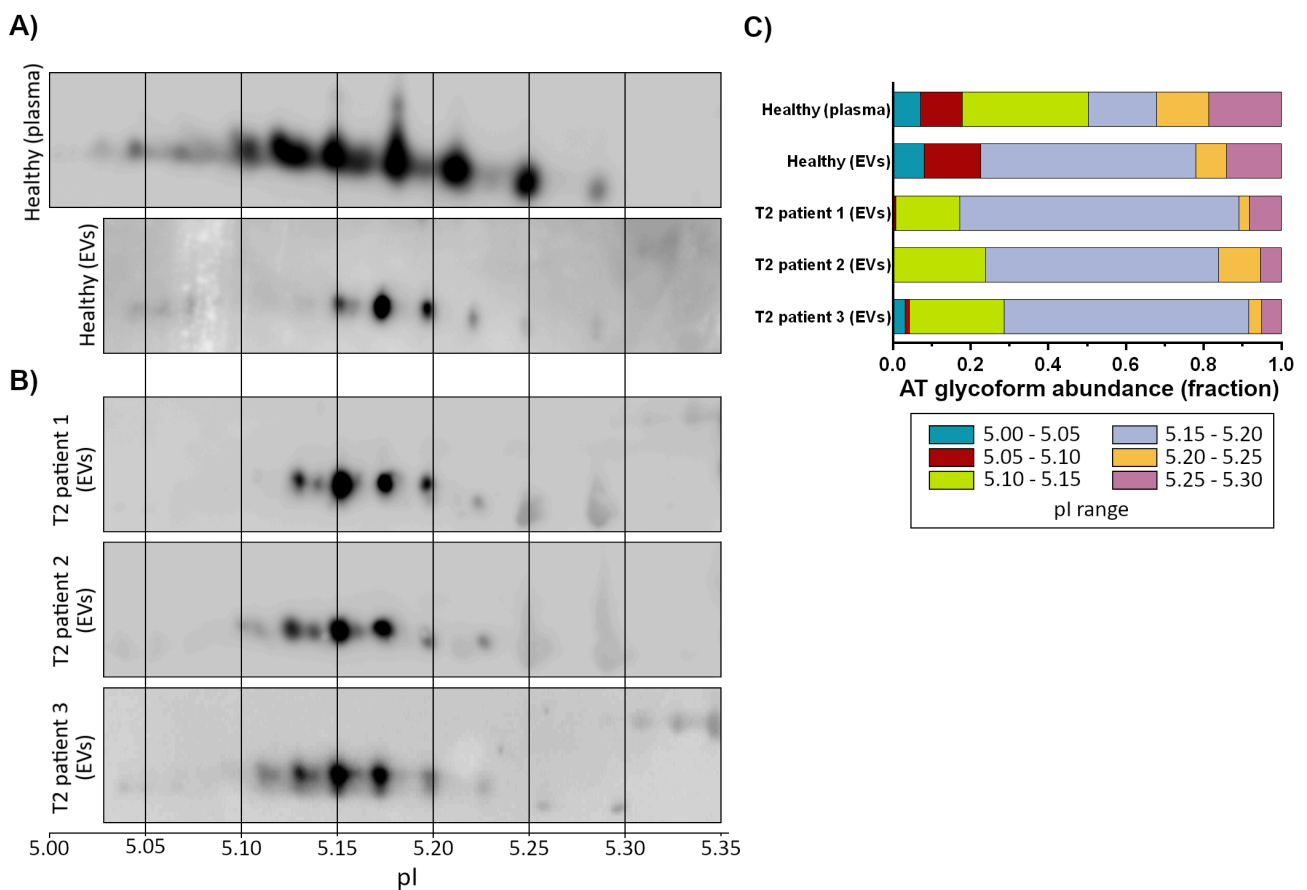

**Supplementary figures**  
**Figure S1**



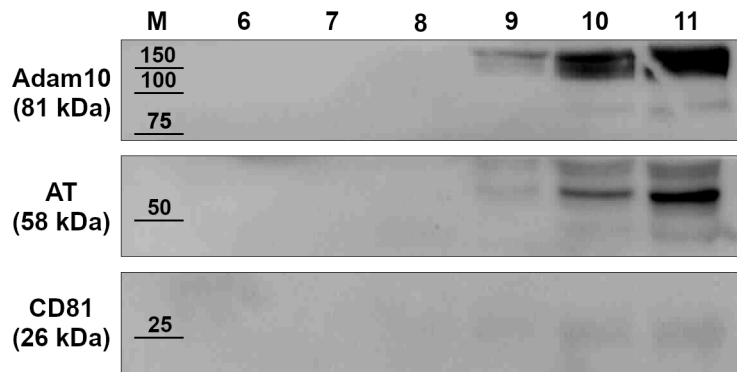

Source: https://www.biorxiv.org/content/biorxiv/early/2021/09/17/2021.07.16.452649.full.pdf
